# Supplementary material for: Dual-energy CT for automatic organs-at-risk segmentation in brain-tumor patients using a multi-atlas and deep-learning approach
Source: PubMed Central journal article supplement (PMC6411877; doi:10.1038/s41598-019-40584-9), 2019-03-11
Supplement: 41598_2019_40584_MOESM1_ESM.pdf [file 41598_2019_40584_MOESM1_ESM.pdf]

## SCIENTIFIC REPORTS

# Dual-energy CT for automatic organs-at-risk segmentation in brain-tumor patients using a multi-atlas and deep-learning approach

Brent van der Heyden<sup>1</sup>, Patrick Wohlfahrt<sup>1</sup>, Daniëlle B.P. Eekers, Christian Richter, Karin Terhaag, Esther G.C. Troost<sup>2</sup>, Frank Verhaegen<sup>2\*</sup>

<sup>1,2</sup>These authors contributed equally.

Corresponding author: [frank.verhaegen@maastro.nl](mailto:frank.verhaegen@maastro.nl)

## SUPPLEMENTARY INFORMATION

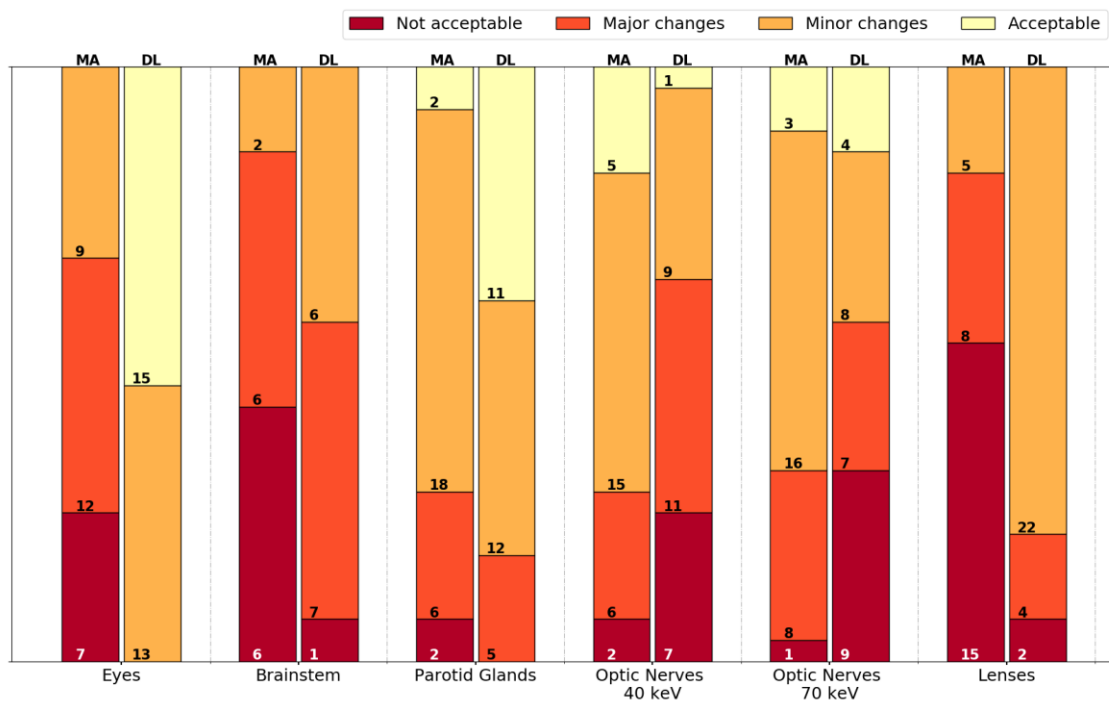

Figure S.1. Qualitative scoring by the first medical specialist.

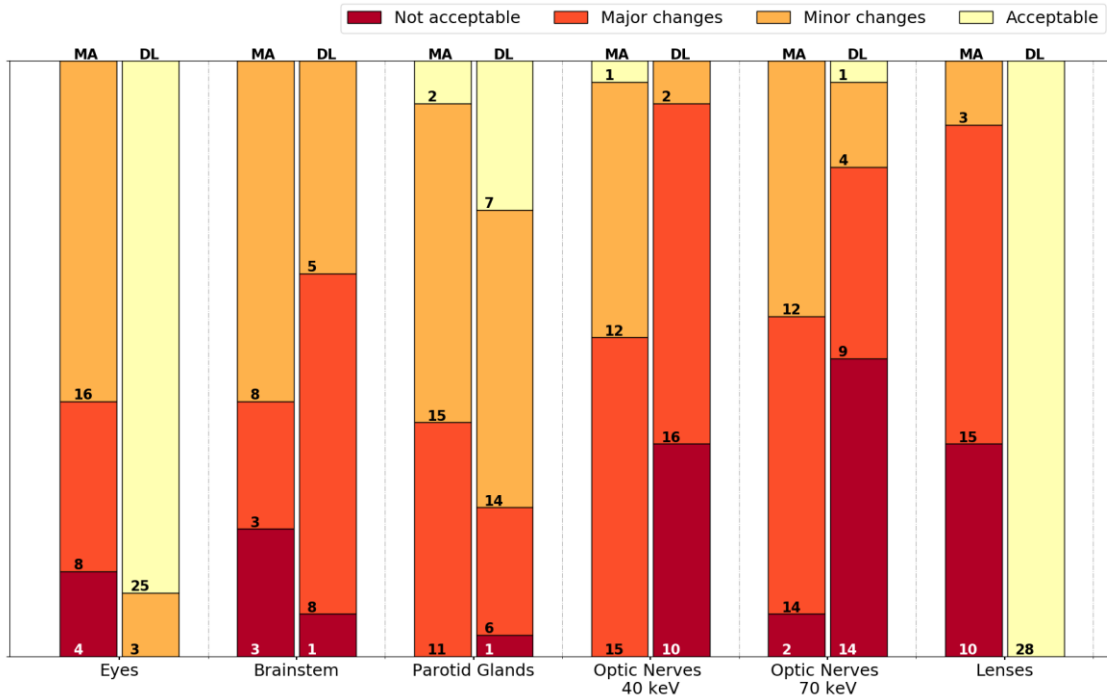

Figure S.2. Qualitative scoring by the second medical specialist.

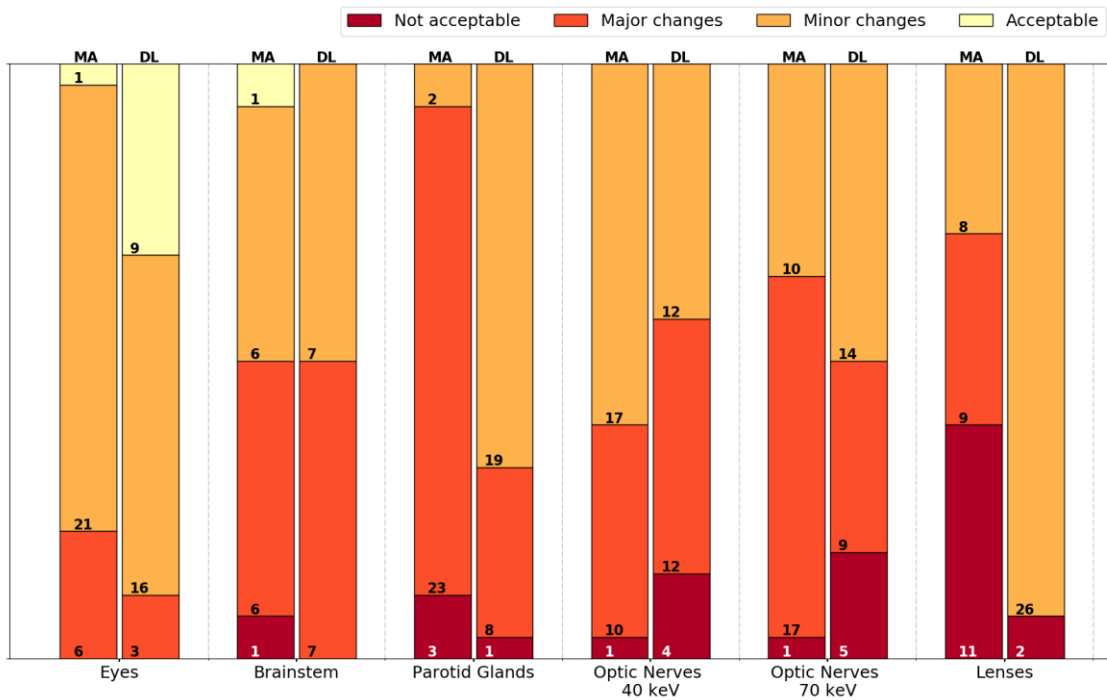

Figure S.3. Qualitative scoring by the third medical specialist.

## SUPPLEMENTARY INFORMATION

The average organ-at-risk (OAR) volume was calculated for 14 patients. The volume is listed for five different segmentation methods: (i) manual segmentation, (ii) deep-learning based segmentation on the 40 keV image dataset, (iii) deep-learning based segmentation on the 70 keV image dataset, (iv) multi-atlas based segmentation on the 40 keV image dataset, and (v) multi-atlas based segmentation on the 70 keV dataset. The OAR volumes were determined considering the number of segmented voxels, the CT slice thickness, and the CT pixel spacing.

**Appendix Table 1.** Average organ-at-risk (OAR) volumes of the manual segmentation.

(L = left, R = right, DL = deep-learning, MA = multi-atlas)

| <b>Average OAR volume [mm<sup>3</sup>]</b> |               |              |              |              |              |
|--------------------------------------------|---------------|--------------|--------------|--------------|--------------|
|                                            | <b>Manual</b> | <b>DL 40</b> | <b>DL 70</b> | <b>MA 40</b> | <b>MA 70</b> |
| Brainstem                                  | 23097         | 20015        | 22015        | 26766        | 26652        |
| Eye L                                      | 7864          | 7518         | 7742         | 8037         | 8068         |
| Eye R                                      | 8202          | 8013         | 8227         | 8393         | 8270         |
| Lens L                                     | 183           | 166          | 132          | 217          | 240          |
| Lens R                                     | 172           | 146          | 144          | 227          | 225          |
| Optic Nerve L                              | 524           | 295          | 295          | 665          | 681          |
| Optic Nerve R                              | 538           | 326          | 264          | 710          | 731          |
| Parotid gland L                            | 24040         | 21534        | 21301        | 28427        | 26974        |
| Parotid gland R                            | 24629         | 22349        | 21982        | 28820        | 27999        |

| <b>Standard deviation [mm<sup>3</sup>]</b> |               |              |              |              |              |
|--------------------------------------------|---------------|--------------|--------------|--------------|--------------|
|                                            | <b>Manual</b> | <b>DL 40</b> | <b>DL 70</b> | <b>MA 40</b> | <b>MA 70</b> |
| Brainstem                                  | 2647          | 4684         | 2757         | 4105         | 4756         |
| Eye L                                      | 650           | 647          | 633          | 856          | 1106         |
| Eye R                                      | 742           | 670          | 675          | 755          | 976          |
| Lens L                                     | 30            | 85           | 57           | 77           | 113          |
| Lens R                                     | 31            | 62           | 28           | 72           | 73           |
| Optic Nerve L                              | 159           | 155          | 233          | 122          | 134          |
| Optic Nerve R                              | 154           | 236          | 222          | 128          | 137          |
| Parotid gland L                            | 10392         | 9278         | 8237         | 12114        | 10938        |
| Parotid gland R                            | 10919         | 9165         | 8144         | 10340        | 9247         |

## SUPPLEMENTARY INFORMATION

The optic nerves are a relatively small volume delineated on every single axial CT slice. Since the anatomical extension of optic nerves is not only in transversal direction, relatively small volumes on multiple axial CT slices do not necessarily form a connected 3D object. This very likely caused the increased difficulties to find a contiguous segmentation volume of the 3D deep-learning approach compared to the MA method. Following figures of the manually segmented optic nerves on three randomly chosen patients illustrate this statement.

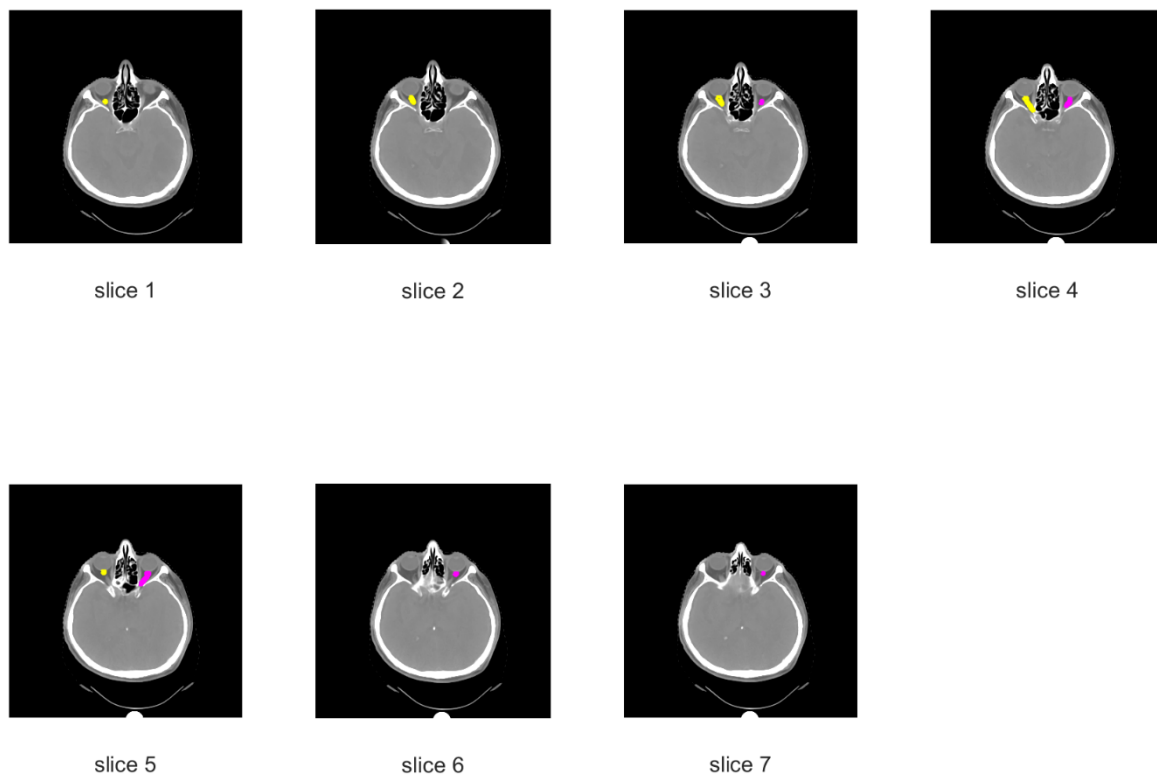

**Figure S.4. Example patient 1**

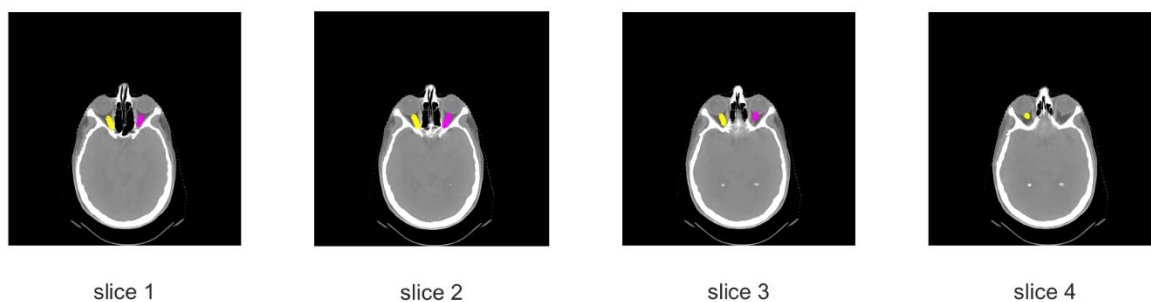

**Figure S.5. Example patient 2**

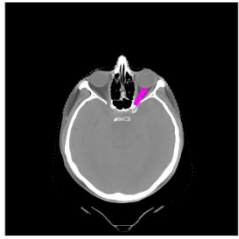

slice 1

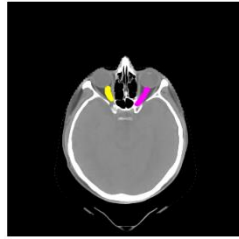

slice 2

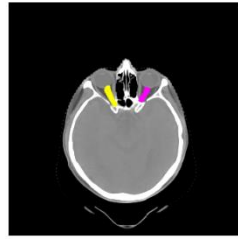

slice 3

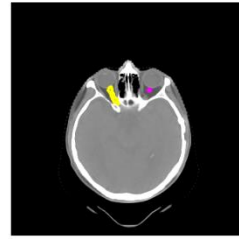

slice 4

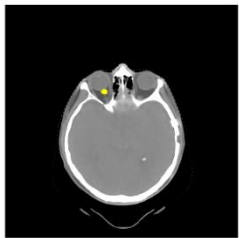

slice 5

**Figure S.6. Example patient 3**
